# Supplementary material for: Multilocus Sequence Typing of Pathogenic Treponemes Isolated from Cloven-Hoofed Animals and Comparison to Treponemes Isolated from Humans
Source: PubMed Central journal article supplement (PMC4984274; doi:10.1128/aem.00025-16), 2016-07-15
Supplement: AEM.00025-16_zam999117294so1.pdf [file AEM.00025-16_zam999117294so1.pdf]

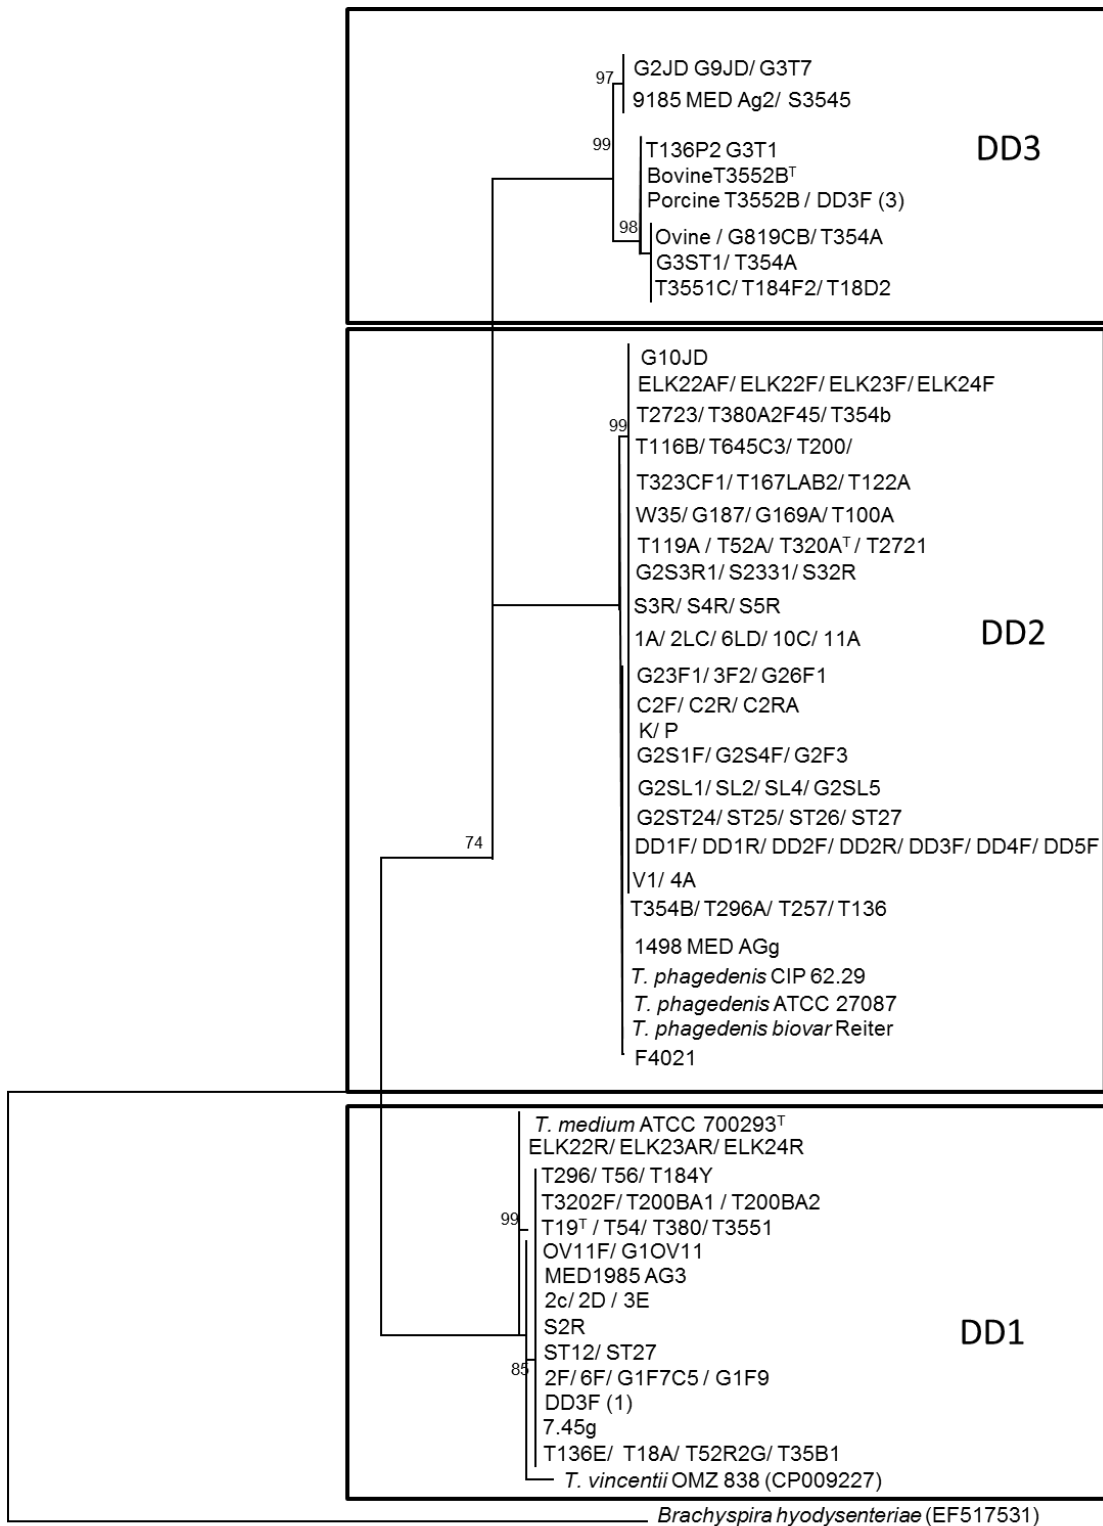

0.05

1

2

3 **Figure S1.** Treponeme phylogenetic tree based on 16S rRNA gene sequences. A

4 maximum likelihood tree (bootstrapped 10,000 times) for comparison of the 16S

5 rRNA gene of the treponeme sequences isolated in this study. (For clarity, bootstrap  
6 values below 65 were removed). Genbank numbers for each individual isolate can be  
7 found in Tables 1, 2 and 3. For simplicity, due to the large number of samples in this  
8 study, sequences which have an identical 16S rRNA gene and from the same host  
9 species have been grouped together.

10 Key: DD1, DD2 and DD3 refer to the DD treponeme phylogroups, where DD1 is  
11 *Treponema medium/Treponema vincentii* phylogroup, DD2 is *Treponema*  
12 *phagedenis* phylogroup and DD3 is *T. pedis* phylogroup.

13

14

15

*T. medium* (DD1)  
phylogroup

ST11

0.001

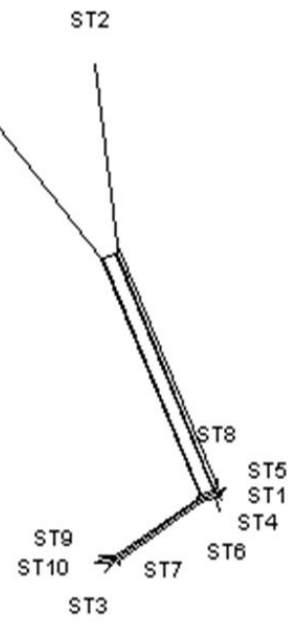

16

17

*T. phagedenis* (DD2) phylogroup

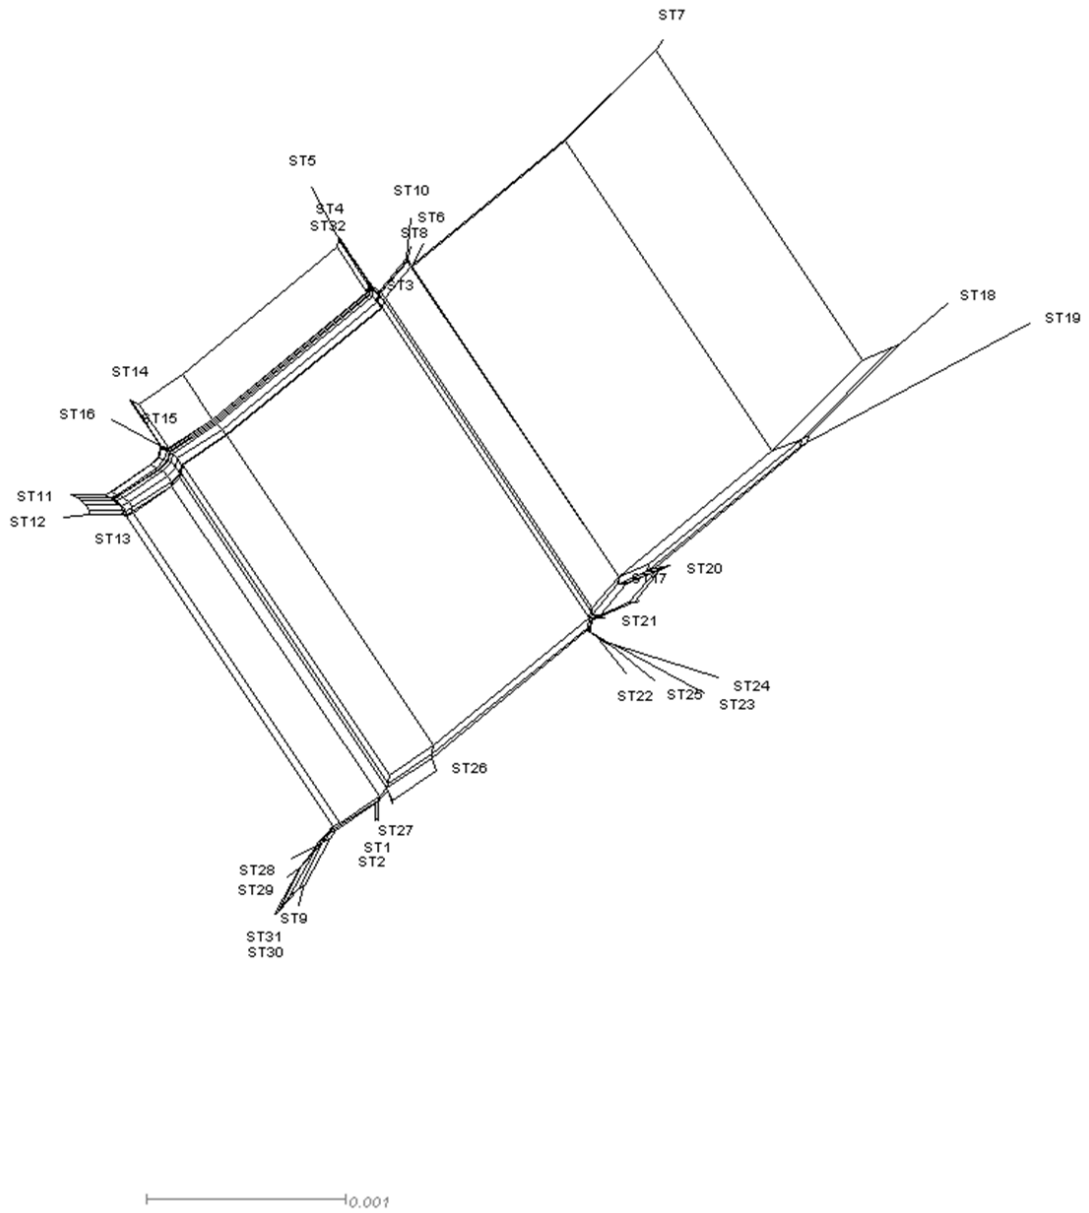

18

19

*T. pedis* phylogroup

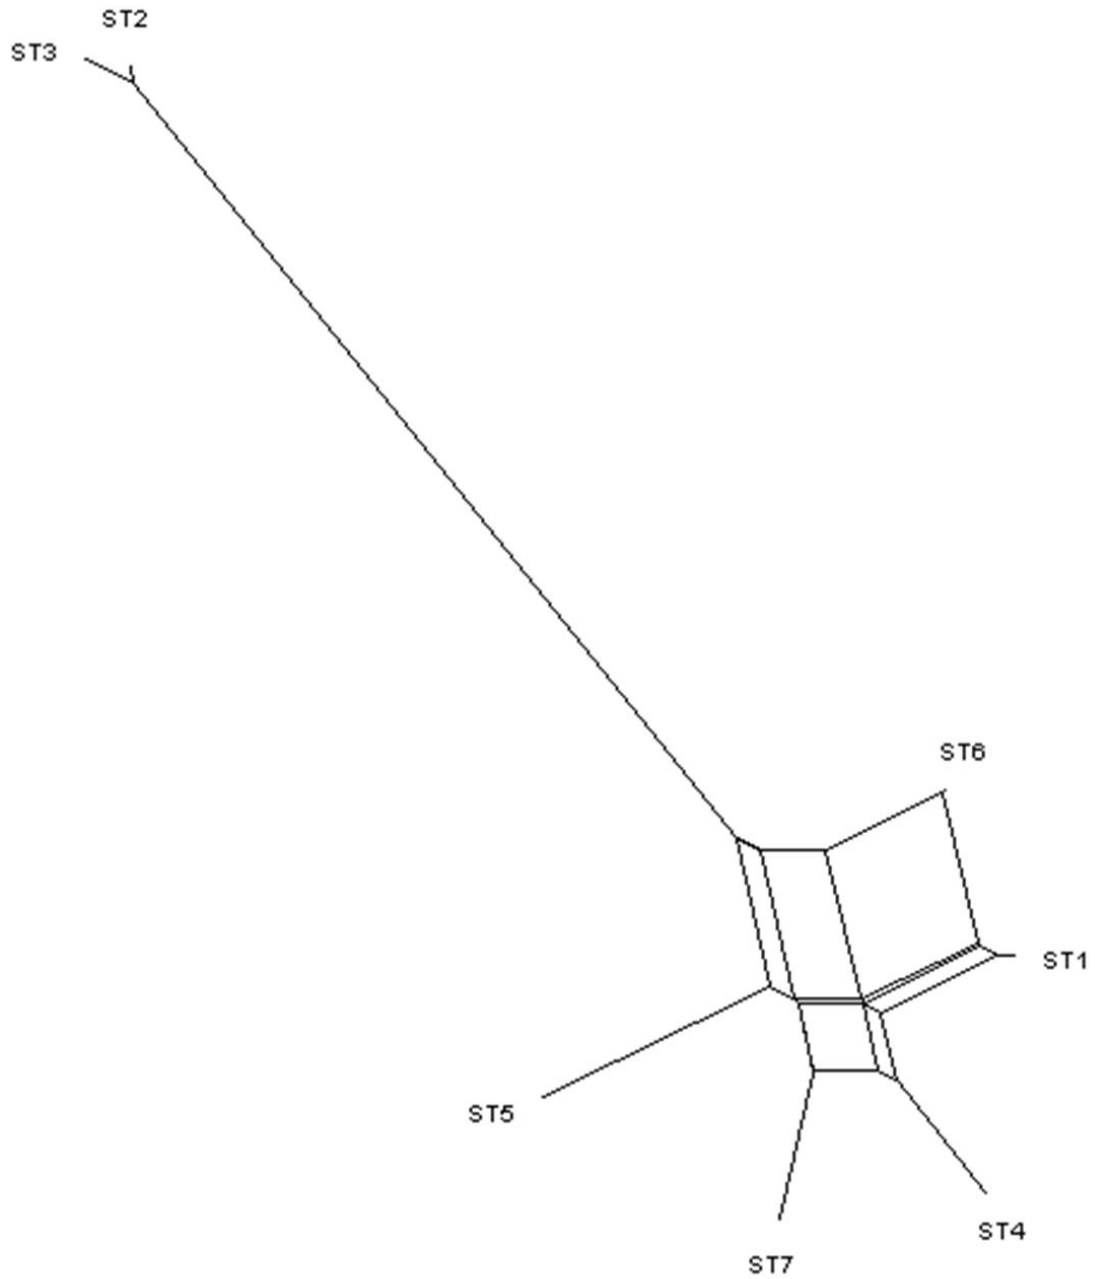

20  
21 **Figure S2.** Splits graphs showing recombination between isolates from the three  
22 phylogroups examined in this study. Key: DD1, DD2 and DD3 refer to the DD  
23 treponeme phylogroups, where DD1 is *Treponema medium* phylogroup, DD2 is  
24 *Treponema phagedenis* phylogroup and DD3 is *T. pedis* phylogroup.

| locus        | <i>T. medium</i> (DD1) phylogroup (n= 34) |                                    |           | <i>T. phagedenis</i> (DD2) phylogroup (n= 70) |                                    |           | <i>T. pedis</i> (DD3) phylogroup (n=17) |                                    |           |
|--------------|-------------------------------------------|------------------------------------|-----------|-----------------------------------------------|------------------------------------|-----------|-----------------------------------------|------------------------------------|-----------|
|              | Number of positive selection sites        | Number of negative selection sites | $d_N/d_S$ | Number of positive selection sites            | Number of negative selection sites | $d_N/d_S$ | Number of positive selection sites      | Number of negative selection sites | $d_N/d_S$ |
| <i>groEL</i> | 0                                         | 0                                  | 5.000E-09 | 0                                             | 0                                  | 6.950E-01 | 0                                       | 0                                  | 5.000E-09 |
| <i>recA</i>  | 0                                         | 0                                  | 5.238E-03 | 0                                             | 0                                  | 1.682E-01 | 0                                       | 0                                  | 2.782E-02 |
| <i>glpK</i>  | 0                                         | 0                                  | 7.409E-02 | 0                                             | 0                                  | 7.269E-01 | 0                                       | 0                                  | 5.000E-09 |
| <i>adK</i>   | 0                                         | 2 (86, 92)                         | 7.974E-02 | 0                                             | 0                                  | 2.532E-01 | 0                                       | 0                                  | 1.168E-01 |
| <i>gdh</i>   | 0                                         | 0                                  | 5.639E-02 | 0                                             | 0                                  | 4.386E-02 | 0                                       | 1 (162)                            | 8.778E-02 |
| <i>pyrG</i>  | 0                                         | 2 (91, 96)                         | 3.206E-02 | 0                                             | 0                                  | 1.094E-01 | 0                                       | 1 (142)                            | 5.000E-09 |
| <i>rplB</i>  | 0                                         | 1 (78)                             | 1.071E-02 | 0                                             | 0                                  | 5.000E-09 | 0                                       | 1 (110)                            | 5.000E-09 |

**Table S1.** Analysis of selection pressures on individual genes.  $d_N/d_S$  is the ratio of non-synonymous substitutions per non-synonymous site to synonymous substitutions per synonymous site.
